# Supplementary material for: Association between patent foramen ovale and migraine without aura: a community-based cross-sectional study in China
Source: HighWire-hosted journal article supplement (doi:10.1136/bmjopen-2021-056937), 2022-03-01

**Supplemental Table A. The indicate number of participants with missing data**

| Value                      | Number | Missing data |
|----------------------------|--------|--------------|
| Screening for PFO          | 3741   | none         |
| Age                        | 3741   | none         |
| Gender                     | 3741   | none         |
| BMI                        | 3639   | 102          |
| Educational level          | 3557   | 184          |
| Smoking                    | 3624   | 117          |
| Alcohol                    | 3505   | 236          |
| Tea                        | 3598   | 143          |
| Coffee                     | 3598   | 143          |
| Sleep quality              | 3599   | 142          |
| Anxiety                    | 3614   | 127          |
| Depression                 | 3608   | 133          |
| Family history of migraine | 2752   | 99           |

**Supplemental Table B. The standardized mean differences of all variables before and after 1:2 nearest neighbor matching for groups with and without PFO**

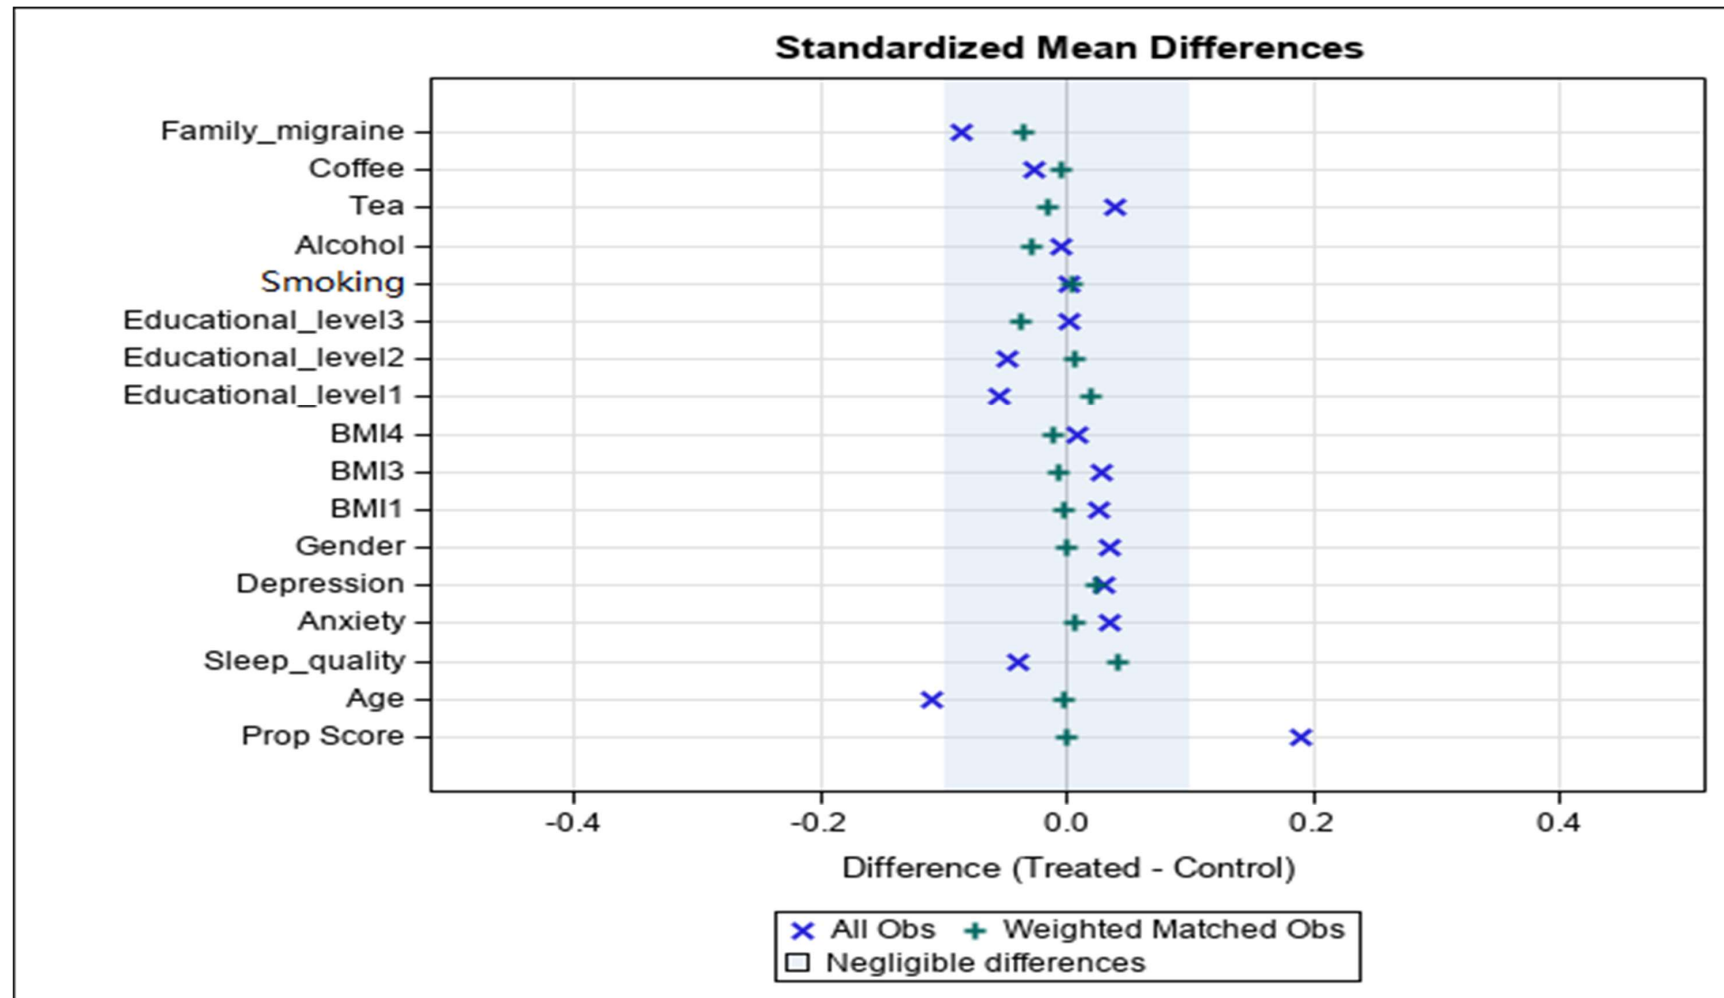

**Supplemental Table C. The standardized mean differences of all variables before and after generalized overlap weighting for groups with different degrees of right-left shunt**

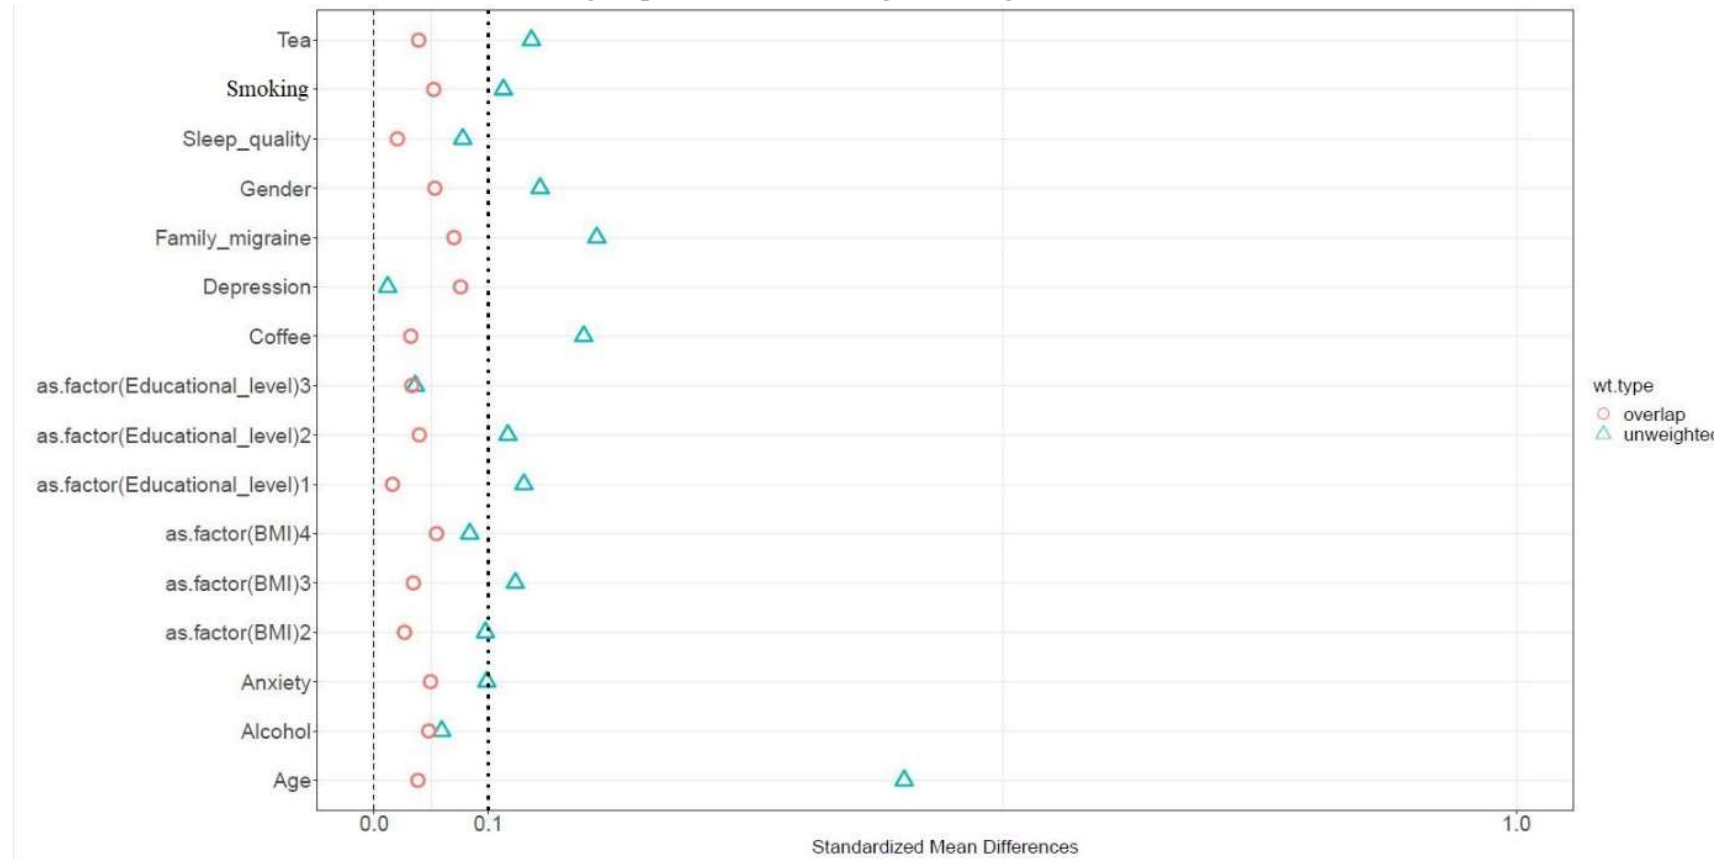

**Supplemental Table D. Marginal distributions of the estimated RLS degrees generalized propensity scores**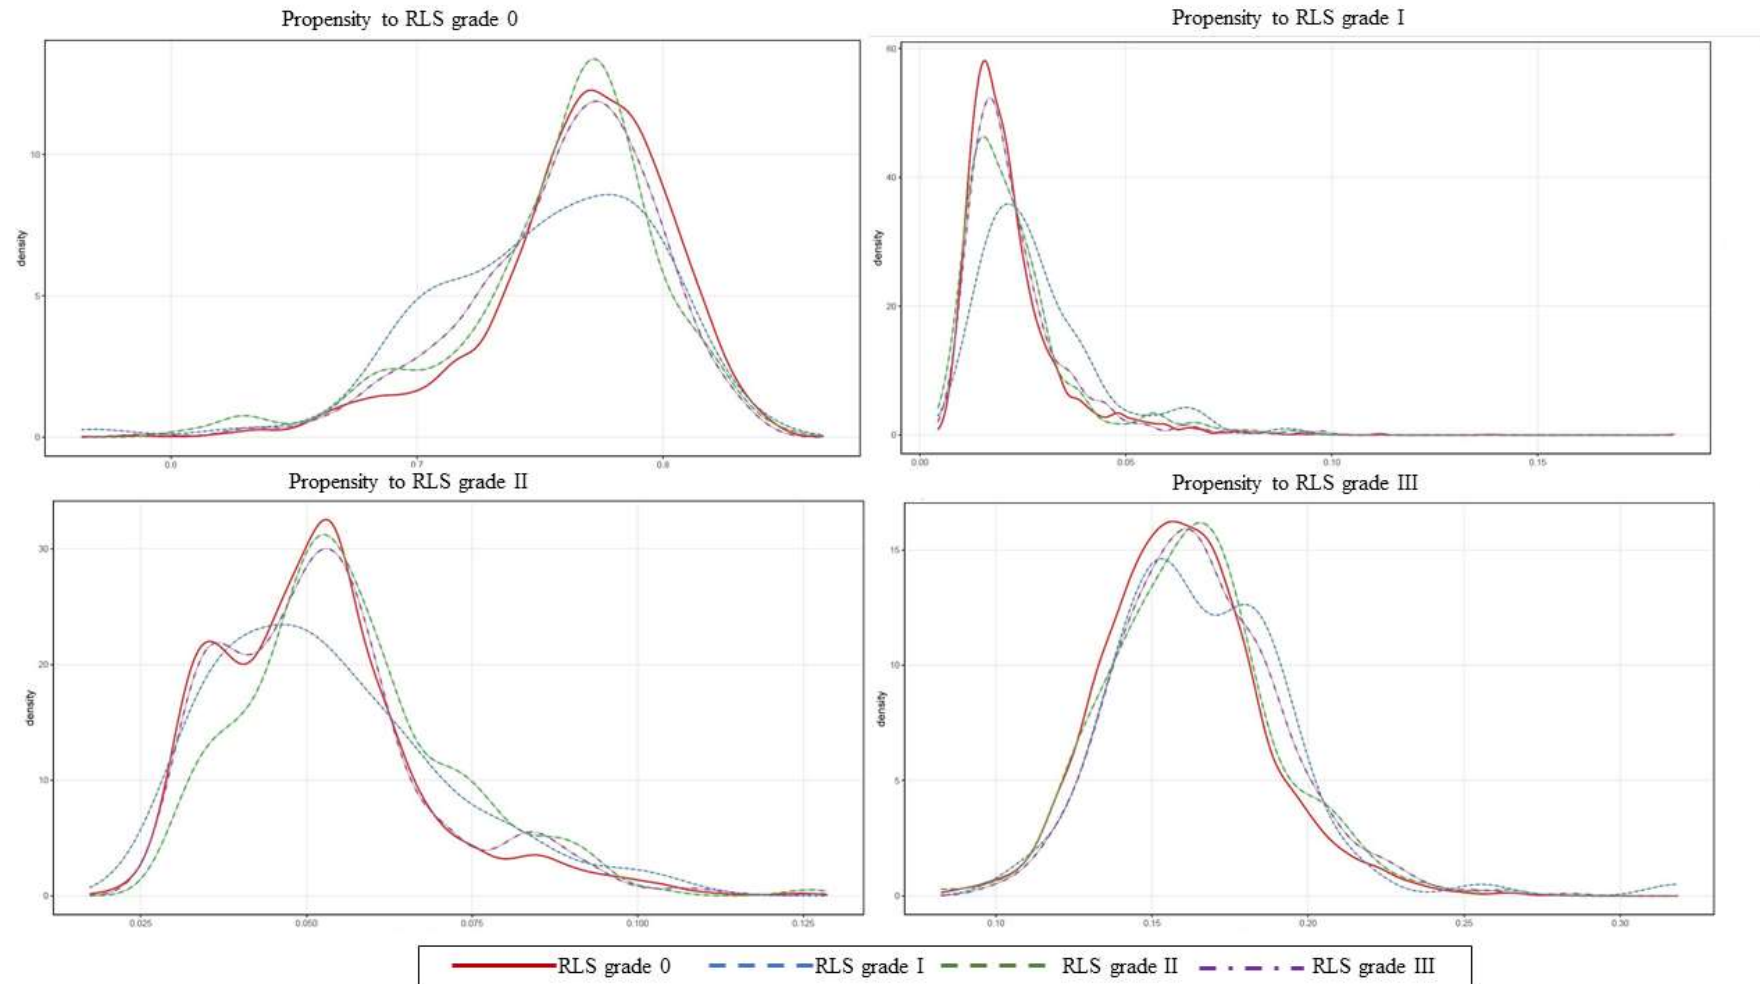

Supplement: bmjopen-2021-056937supp001_data_supplement.pdf [file bmjopen-2021-056937supp001_data_supplement.pdf]
